# Supplementary material
Source: PubMed Central journal article supplement (PMC10071430)
Supplement: PEDS_2022059833SupplementaryData.pdf [file PEDS_2022059833SupplementaryData.pdf]

## Supplemental Information

### SUPPLEMENTAL INFORMATION 1. COHORT DEVELOPMENT

Initial intervention and comparison cohorts were identified among children in Medicaid and HMIS datasets during

the study period. Cohorts were matched based on the traits in Supplemental Information 1, and then further refined to ensure receipt of housing resources and sufficient Medicaid data in the

comparison cohort around the time in which the matching PSH-receiving child entered PSH. This process, and the cohort sizes at each step, are shown in Supplemental Figure 2.

**SUPPLEMENTAL TABLE 3** Matching Criteria

| Exact Match Criteria                                                                            | Propensity Score Weighting Criteria                                                             |
|-------------------------------------------------------------------------------------------------|-------------------------------------------------------------------------------------------------|
| Date of birth within 12 mo                                                                      | Date of birth within 12 mo                                                                      |
| Gender                                                                                          | Gender                                                                                          |
| Pennsylvania managed care region <sup>a</sup>                                                   | Pennsylvania managed care region <sup>a</sup>                                                   |
| Documented parental or guardian diagnosis of mental illness at any time during the study period | Documented parental or guardian diagnosis of mental illness at any time during the study period |
| Documented parental or guardian diagnosis of disability linked to Medicaid enrollment           | Documented parental or guardian diagnosis of disability linked to Medicaid enrollment           |
|                                                                                                 | Urbanicity                                                                                      |
|                                                                                                 | Lived in Pittsburgh or surrounding county on index date                                         |
|                                                                                                 | Medical complexity <sup>b</sup>                                                                 |

<sup>a</sup> Managed care regions are regional divisions in Medicaid claims data included in matching to minimize differences in health utilization related to location.

<sup>b</sup> The Pediatric Medical Complexity Algorithm (PMCA) uses diagnoses in claims-based data to categorize children according to Center of Excellence on Quality of Care Measures for Children with Complex Needs consensus definitions. These definitions establish three levels of medical complexity: children with complex chronic disease (ie, with significant chronic conditions in  $\geq 2$  body systems, a progressive condition that is associated with deteriorating health with a decreased life expectancy, continuous dependence on technology for at least 6 mo, or malignancies), children with noncomplex chronic disease (chronic conditions that last at least 1 y), and children without chronic disease.<sup>35</sup> The PMCA exists in different forms optimized to analyze medical complexity in different data settings. We used the "conservative" definitions and algorithm v3.2.<sup>49</sup>

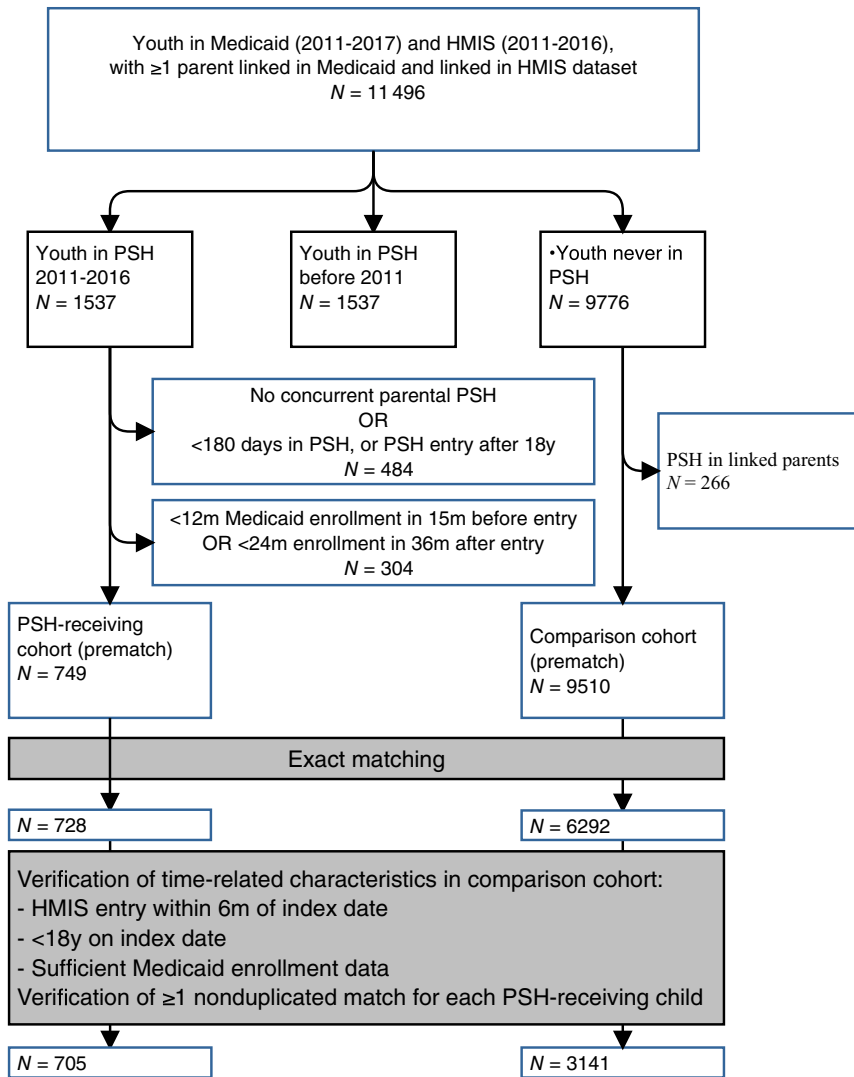

**SUPPLEMENTAL FIGURE 2**

Cohort selection and matching. “Sufficient Medicaid data”: enrollment in Medicaid in 12 of the 15 months before PSH entry (or index date in the comparison cohort), and 24 of the 36 months immediately after PSH entry or index date. “≥1 parent linked in Medicaid”: Medicaid data includes a family ID variable. We inferred that adults >18 sharing a family ID with children were likely parents or guardians. To select for child-adult pairs that experienced risk of homelessness together, we included only child-adult pairs who were both present in HMIS and included in our intervention-receiving cohort only those child-adult pairs that entered PSH within 30 days of each other.

**SUPPLEMENTAL INFORMATION 2. OUTCOME MEASURE DEFINITIONS**

Because claims data may contain multiple records of a single encounter, we counted only the first encounter of a given type per person-day. We defined care of the following types:

Dental visits were as the union of treatment and preventive visits.

- Preventive dental visits were defined based on the CDT codes D0120, D0145, D0150, D0210, D0220, D0230, D0240, D0270, D0272, D0273, D0274, D1110, D1120, D1201, D1203, D1206, D1208, D1351, D1353. These include diagnostic services such as radiography, since this may be an important component in primary prevention.
- Treatment-related dental visits were defined based on the CDT codes D2-D9.

Preventive medicine visits were defined using CPT codes 99391-99395 and 99381-99385.

Inpatient visits were defined using claims from Medicaid inpatient files, which include admissions to short-stay acute care hospitals.

Emergency room visits were defined as visits using 1 of the procedure

codes '0450' '0451' '0452' '0456' '0459' and '0981', and 1 of the revenue codes '99281' '99282' '99283' '99284' '99285' 'G0380' 'G0381' 'G0382' 'G0383' 'G0384' 'G0385.' We included only visits which were not immediately followed by an inpatient admission to a short-stay acute care hospital and did not result in death.

**SUPPLEMENTAL INFORMATION 3. COMPARING COUNTS AND MEAN AGES OF STUDY COHORTS BY YEAR (SENSITIVITY ANALYSES)**

Differential attrition from our cohorts could affect our analyses in 2 ways:

1. Unmeasured differences between the 2 cohorts might drive different rates of attrition from Medicaid enrollment, resulting in poorer cohort matching over time.
2. Since utilization is closely linked to age, as shown in Supplemental Table 4, if the 2 cohorts exhibited patterns of attrition that differed by age, this would result in poorer age matching over time, potentially introducing differences in utilization trends that are not attributable to PSH.

In order to examine for differing rates of attrition, we (1) examined the number of children who remained enrolled in Medicaid in each of the three years before and after the PSH move-in date (intervention cohort) or index date (comparison cohort). In order to assess for different patterns of attrition by age in the cohorts, we (2) examined the mean age of the 2 cohorts over the same period. Because we follow the same children over time, we expect a mean increase in age by year. However, we expect these mean increases to be similar across the intervention and comparison cohorts, such that age differences between the cohorts remain constant. Differential changes in age (implying non-constant age differences between the cohorts over time) would raise concern about bias from compositional changes across the cohorts.

Because the number of children and mean age of the children showed similar patterns in the 2 cohorts, we conclude that different rates of attrition and differential age-related patterns of attrition were unlikely to be significant drivers of the different changes in health utilization we found in our cohorts.

**SUPPLEMENTAL TABLE 4** Mean Age in PSH and Comparison Cohorts in Each Study Year

| Year to Index | Intervention Cohort (Received PSH) |         |                    | Comparison Cohort |         |                    |
|---------------|------------------------------------|---------|--------------------|-------------------|---------|--------------------|
|               | Age, Mean                          | Age, SD | Number of Children | Age, Mean         | Age, SD | Number of Children |
| -3            | 5.90                               | 4.45    | 608                | 5.84              | 4.46    | 2688               |
| -2            | 6.21                               | 4.75    | 688                | 6.17              | 4.74    | 3073               |
| -1            | 6.97                               | 4.87    | 705                | 6.97              | 4.84    | 3141               |
| 0             | 7.97                               | 4.87    | 705                | 7.97              | 4.84    | 3140               |
| 1             | 8.97                               | 4.87    | 705                | 8.97              | 4.84    | 3141               |
| 2             | 9.94                               | 4.87    | 697                | 9.94              | 4.84    | 3078               |

**SUPPLEMENTAL INFORMATION 4.  
FULL REGRESSION ESTIMATES**

The difference-in-difference analysis was performed as a linear regression between matched, propensity-score weighted intervention and comparison

cohorts. Independent variables included an indicator for the intervention cohort (“PSH receipt”), post-PSH entry (or index) date, an interaction between the intervention and post-PSH entry indicators, and all variables

included in matching. The regression coefficient on the interaction term is our difference-in-differences estimate. Both year of entry and age were included as covariates and were treated as categorical variables.

**SUPPLEMENTAL TABLE 5** Full Regression Estimates From Difference-in-Difference Models

|                                               | Dental Visits             | Preventive Dental Visits   | Treatment Dental Visits   | Preventive Medicine Visits      | Hospitalization              | Emergency Department Visits   |
|-----------------------------------------------|---------------------------|----------------------------|---------------------------|---------------------------------|------------------------------|-------------------------------|
| PSH receipt                                   | 0.90 (−6.39 to 8.20)      | 0.86 (−3.59 to 5.32)       | 1.19 (−4.29 to 6.67)      | −2.07 (−6.97 to 2.83)           | −0.83 (−3.00 to 1.34)        | −1.61 (−8.94 to 5.73)         |
| Postindex date                                | 10.10** (3.13 to 17.08)   | 5.10* (1.01 to 9.20)       | 6.68* (1.43 to 11.94)     | −30.23*** (−34.00 to −26.46)    | −2.84 (−6.55 to 0.88)        | −8.30** (−14.59 to −2.02)     |
| PSH receipt and Postindex date interaction    | 12.70** (3.72 to 21.67)   | 7.65** (2.02 to 13.28)     | 4.52 (−2.22 to 11.25)     | 2.49 (−4.03 to 9.00)            | −2.02 (−6.35 to 2.31)        | −4.55 (−13.35 to 4.25)        |
| Age, y                                        |                           |                            |                           |                                 |                              |                               |
| <1                                            | Reference                 | Reference                  | Reference                 | Reference                       | Reference                    | Reference                     |
| 1–2                                           | 14.17 (−4.59 to 32.93)    | 16.05* (1.04 to 31.05)     | 1.34 (−5.76 to 8.44)      | −33.90* (−64.98 to −2.81)       | −12.44*** (−18.37 to −6.52)  | −51.57* (−95.30 to −7.84)     |
| 3–5                                           | 42.92*** (24.01 to 61.83) | 40.37*** (25.31 to 55.43)  | 12.40*** (5.06 to 19.74)  | −102.36*** (−133.12 to −71.61)  | −26.30*** (−32.34 to −20.25) | −69.04** (−112.48 to −25.59)  |
| 6–11                                          | 59.11*** (40.13 to 78.10) | 45.73*** (30.69 to 60.76)  | 26.85*** (19.28 to 34.41) | −127.85*** (−158.55 to −97.16)  | −27.74*** (−33.51 to −21.97) | −96.20*** (−139.43 to −52.96) |
| 12–18                                         | 71.91*** (51.65 to 92.17) | 32.21*** (17.10 to 47.31)  | 51.22*** (41.39 to 61.05) | −135.01*** (−165.77 to −104.26) | −20.31*** (−28.06 to −12.55) | −76.82*** (−120.69 to −32.95) |
| Female                                        | 11.02*** (4.72 to 17.32)  | 6.05** (2.37 to 9.72)      | 5.20* (0.61 to 9.80)      | 0.81 (−2.00 to 3.63)            | −0.83 (−3.52 to 1.86)        | 7.58* (1.53 to 13.63)         |
| Race                                          |                           |                            |                           |                                 |                              |                               |
| Non-Hispanic white                            | Reference                 | Reference                  | Reference                 | Reference                       | Reference                    | Reference                     |
| Non-Hispanic Black                            | −0.24 (−7.59 to 7.11)     | −1.91 (−6.03 to 2.21)      | −1.22 (−6.83 to 4.40)     | −7.87*** (−10.92 to −4.81)      | 1.03 (−2.33 to 4.40)         | −2.77 (−9.33 to 3.79)         |
| Hispanic                                      | −13.02 (−29.74 to 3.70)   | −3.33 (−14.25 to 7.60)     | −9.45 (−20.17 to 1.27)    | 4.86 (−3.90 to 13.62)           | −1.39 (−5.43 to 2.65)        | 15.57 (−1.43 to 32.56)        |
| Others                                        | 15.98 (−5.67 to 37.62)    | 9.12 (−0.79 to 19.02)      | 4.86 (−11.54 to 21.27)    | 9.14* (0.04 to 18.24)           | −1.28 (−4.19 to 1.62)        | 2.36 (−14.34 to 19.07)        |
| Nonurban                                      | −4.01 (−16.57 to 8.54)    | −2.81 (−10.60 to 4.98)     | −2.19 (−10.07 to 5.70)    | −8.07* (−14.71 to −1.43)        | 0.13 (−3.29 to 3.55)         | 8.63 (−7.21 to 24.46)         |
| Resided in Pittsburgh or surrounding county   | −4.19 (−14.48 to 6.10)    | −1.27 (−7.86 to 5.32)      | 0.09 (−6.33 to 6.50)      | −2.48 (−7.22 to 2.27)           | −1.14 (−3.77 to 1.49)        | −10.40 (−23.66 to 2.86)       |
| Medical complexity                            |                           |                            |                           |                                 |                              |                               |
| No chronic disease                            | Reference                 | Reference                  | Reference                 | Reference                       | Reference                    | Reference                     |
| Complex chronic disease                       | 9.93 (−0.65 to 20.51)     | 10.33** (3.81 to 16.86)    | 0.20 (−7.81 to 8.22)      | 14.86*** (9.89 to 19.84)        | 25.47*** (12.28 to 38.67)    | 57.06*** (41.79 to 72.34)     |
| Noncomplex chronic disease                    | 10.31** (2.67 to 17.96)   | 8.05*** (3.80 to 12.31)    | 4.98 (−0.70 to 10.67)     | 5.16** (2.05 to 8.27)           | 5.56*** (3.68 to 7.44)       | 27.06*** (19.83 to 34.29)     |
| Pennsylvania managed care region              |                           |                            |                           |                                 |                              |                               |
| Southwest                                     | Reference                 | Reference                  | Reference                 | Reference                       | Reference                    | Reference                     |
| New West                                      | −6.59 (−22.74 to 9.57)    | −5.07 (−15.24 to 5.11)     | −0.64 (−10.57 to 9.29)    | −1.37 (−10.98 to 8.23)          | 1.18 (−2.71 to 5.07)         | −5.29 (−23.82 to 13.24)       |
| New East                                      | −4.10 (−36.49 to 28.30)   | −0.88 (−26.03 to 24.28)    | −1.84 (−17.97 to 14.30)   | −3.79 (−13.70 to 6.12)          | 4.14 (−8.64 to 16.92)        | 0.76 (−42.92 to 44.43)        |
| Lehigh Capital                                | 16.26 (−10.79 to 43.30)   | 4.16 (−7.43 to 15.76)      | 11.82 (−9.31 to 32.95)    | −9.39* (−18.27 to −0.52)        | −0.28 (−6.80 to 6.25)        | −2.09 (−19.44 to 15.26)       |
| Southeast                                     | 14.23 (−8.98 to 37.44)    | 13.71 (−4.36 to 31.78)     | 3.80 (−6.02 to 13.62)     | 2.71 (−13.71 to 19.13)          | 1.49 (−2.34 to 5.31)         | −25.58 (−56.14 to 4.99)       |
| Parental mental illness                       | −3.12 (−28.03 to 21.78)   | 2.87 (−7.58 to 13.35)      | −7.34 (−26.05 to 11.36)   | 6.29* (0.59 to 11.99)           | 1.38 (−1.26 to 4.03)         | 17.71** (6.74 to 28.69)       |
| Parental SUD                                  | −9.48* (−16.84 to −2.12)  | −7.91*** (−12.23 to −3.60) | −1.83 (−7.13 to 3.46)     | −2.93 (−5.93 to 0.06)           | 1.58 (−1.11 to 4.27)         | −7.36* (−14.32 to −0.39)      |
| Parent enrolled in both Medicaid and Medicare | 5.72 (−4.70 to 16.13)     | 1.62 (−3.76 to 6.99)       | 3.50 (−4.28 to 11.28)     | −0.56 (−4.59 to 3.46)           | 2.76 (−2.92 to 8.44)         | −4.50 (−14.95 to 5.94)        |
| Parent with disability                        | 4.76 (−3.88 to 13.40)     | 2.36 (−1.98 to 6.69)       | 3.18 (−3.36 to 9.71)      | 1.51 (−1.87 to 4.90)            | 1.61 (−0.66 to 3.89)         | 12.15** (3.81 to 20.48)       |
| Quarter of entry                              |                           |                            |                           |                                 |                              |                               |
| January–March                                 | −2.08 (−7.07 to 2.92)     | −1.97 (−6.07 to 2.14)      | −0.00 (−3.03 to 3.02)     | 3.07 (−0.97 to 7.12)            | 0.25 (−1.15 to 1.65)         | 1.17 (−3.44 to 5.79)          |
| April–June                                    | −3.94 (−8.20 to 0.32)     | −3.98* (−7.24 to −0.74)    | −0.46 (−3.32 to 2.40)     | 1.20 (−2.74 to 5.14)            | −1.59* (−3.07 to −0.10)      | 1.91 (−2.57 to 6.40)          |
| July–September                                | −1.97 (−6.73 to 2.80)     | −0.72 (−4.82 to 3.38)      | −1.86 (−4.64 to 0.92)     | 8.55*** (4.36 to 12.74)         | −1.27 (−2.75 to 0.21)        | −1.64 (−6.11 to 2.83)         |
| October–December                              | Reference                 | Reference                  | Reference                 | Reference                       | Reference                    | Reference                     |

SUPPLEMENTAL TABLE 5 Continued

| Year fixed effects (year outcomes are measured) | Dental Visits           |                        | Preventive Dental Visits |                         | Treatment Dental Visits |                         | Preventive Medicine Visits |           | Hospitalization |           | Emergency Department Visits |           |
|-------------------------------------------------|-------------------------|------------------------|--------------------------|-------------------------|-------------------------|-------------------------|----------------------------|-----------|-----------------|-----------|-----------------------------|-----------|
|                                                 | Reference               | Reference              | Reference                | Reference               | Reference               | Reference               | Reference                  | Reference | Reference       | Reference | Reference                   | Reference |
| 2008                                            | 9.61 (-21.70 to 40.92)  | 3.33 (-19.89 to 26.54) | 6.04 (-15.36 to 27.44)   | 13.74 (-8.87 to 36.34)  | 3.07 (-7.19 to 13.32)   | 5.95 (-24.77 to 36.67)  |                            |           |                 |           |                             |           |
| 2009                                            | 23.80 (-6.95 to 54.56)  | 7.90 (-13.77 to 29.58) | 16.21 (-5.53 to 37.96)   | 2.57 (-18.61 to 23.75)  | 2.53 (-6.65 to 11.71)   | 2.53 (-27.60 to 32.65)  |                            |           |                 |           |                             |           |
| 2010                                            | 18.46 (-11.49 to 48.41) | 7.27 (-14.35 to 28.89) | 11.28 (-9.02 to 31.58)   | 0.24 (-21.14 to 21.63)  | 3.55 (-5.62 to 12.72)   | 4.63 (-24.40 to 33.65)  |                            |           |                 |           |                             |           |
| 2011                                            | 17.57 (-11.33 to 46.47) | 11.40 (-9.93 to 32.74) | 7.29 (-12.10 to 26.67)   | -4.91 (-25.79 to 15.97) | 1.18 (-7.69 to 10.05)   | 9.39 (-19.50 to 38.27)  |                            |           |                 |           |                             |           |
| 2012                                            | 25.78 (-3.51 to 55.07)  | 18.24 (-3.12 to 39.60) | 9.05 (-10.59 to 28.68)   | -7.10 (-27.95 to 13.75) | -1.09 (-9.77 to 7.58)   | 17.00 (-12.05 to 46.04) |                            |           |                 |           |                             |           |
| 2013                                            | 32.49* (2.94 to 62.04)  | 22.00* (0.55 to 43.45) | 14.09 (-5.97 to 34.15)   | -7.53 (-28.21 to 13.16) | -1.09 (-9.75 to 7.57)   | 9.59 (-19.58 to 38.77)  |                            |           |                 |           |                             |           |
| 2014                                            | 33.02* (3.19 to 62.85)  | 21.49 (-0.01 to 43.00) | 13.85 (-6.46 to 34.16)   | -12.78 (-33.49 to 7.93) | -1.52 (-10.40 to 7.36)  | 5.30 (-24.27 to 34.88)  |                            |           |                 |           |                             |           |
| 2015                                            | 37.13* (7.00 to 67.26)  | 25.35* (3.52 to 47.17) | 16.53 (-3.81 to 36.87)   | -16.15 (-36.93 to 4.63) | -1.00 (-9.92 to 7.92)   | 1.61 (-28.33 to 31.56)  |                            |           |                 |           |                             |           |
| 2016                                            | 35.24* (4.32 to 66.15)  | 24.32* (2.27 to 46.37) | 13.05 (-7.96 to 34.05)   | -11.05 (-31.92 to 9.81) | 0.16 (-8.78 to 9.11)    | 0.34 (-30.21 to 30.90)  |                            |           |                 |           |                             |           |
| 2017                                            | 41.06* (8.64 to 73.47)  | 27.49* (4.90 to 50.09) | 14.11 (-8.09 to 36.31)   | -18.90 (-39.92 to 2.12) | -1.29 (-10.51 to 7.92)  | -3.63 (-35.19 to 27.94) |                            |           |                 |           |                             |           |
| 2018                                            |                         |                        |                          |                         |                         |                         |                            |           |                 |           |                             |           |

95% confidence intervals are presented in parentheses. Medical complexity determined using the Pediatric Medical Complexity Algorithm, which is based on Center of Excellence on Quality of Care Measures for Children with Complex Needs consensus definitions. SUD, substance use disorder.

\*  $P < .05$ , \*\*  $P < .01$ , \*\*\*  $P < .001$ .

**SUPPLEMENTAL INFORMATION 5.  
DIFFERENCE-IN-DIFFERENCE  
CALCULATIONS BY TYPE OF DENTAL  
CARE (SENSITIVITY ANALYSIS)**

**SUPPLEMENTAL TABLE 6** Change in Different Types of Dental Care Utilization

| Outcome (Visits per<br>1000 Person-Months) | Intervention Cohort (Received PSH) |        |                         | Comparison Cohort |       |                        | DID (95% CI)           | P for<br>DID | P for<br>Baseline<br>Differences |
|--------------------------------------------|------------------------------------|--------|-------------------------|-------------------|-------|------------------------|------------------------|--------------|----------------------------------|
|                                            | Baseline                           | Y1-3   | Difference (95% CI)     | Baseline          | Y1-3  | Difference (95% CI)    |                        |              |                                  |
| All dental visits                          | 71.01                              | 100.62 | 22.80* (14.43 to 31.17) | 75.48             | 94.25 | 10.10* (3.13 to 17.08) | 12.70* (3.72 to 21.67) | .006         | .808                             |
| Preventive dental visits                   | 51.65                              | 71.63  | 12.75* (7.38 to 18.12)  | 54.63             | 67.24 | 5.10* (1.01 to 9.20)   | 7.65* (2.02 to 13.28)  | .008         | .705                             |
| Treatment dental visits                    | 28.29                              | 39.94  | 11.20* (5.16 to 17.24)  | 28.94             | 36.88 | 6.68* (1.43 to 11.94)  | 4.52 (-2.22 to 11.25)  | .189         | .671                             |

Preventive and Treatment visits sum to more than "all dental visits" because preventive and treatment dental care may have occurred on the same day.

\*  $P < .05$ .

**SUPPLEMENTAL INFORMATION 6.  
DIFFERENCE-IN-DIFFERENCE ANALYSIS  
STRATIFIED BY AGE AND MEDICAL  
COMPLEXITY**

Because healthcare utilization varies greatly by age and

medical complexity, we ran stratified regressions for age groupings commonly used in pediatric literature, and for patients with and without chronic conditions.

**SUPPLEMENTAL TABLE 7** Change in Utilization Associated With PSH Entry Among Age and Medical Complexity Subgroups

| Outcome (Visits per 1000 Person-Months)               | Intervention Cohort (Received PSH) |        |                            | Comparison Cohort |        |                            | DID (95% CI)              |
|-------------------------------------------------------|------------------------------------|--------|----------------------------|-------------------|--------|----------------------------|---------------------------|
|                                                       | Baseline                           | Y1–3   | Difference (95% CI)        | Baseline          | Y1–3   | Difference (95% CI)        |                           |
| <b>Dental visits</b>                                  |                                    |        |                            |                   |        |                            |                           |
| Children aged 0–5                                     | 35.12                              | 88.38  | 40.34* (31.13 to 49.56)    | 40.27             | 84.37  | 32.75* (25.58 to 39.92)    | 7.6 (–1.78 to 16.97)      |
| Children aged 6–11                                    | 92.22                              | 103.68 | 1.9 (–11.61 to 15.42)      | 83.67             | 97.11  | 1.97 (–8.32 to 12.26)      | –0.07 (–14.40 to 14.26)   |
| Children aged 12–17                                   | 98.07                              | 118.54 | 18.52 (–2.66 to 39.71)     | 115.17            | 107.28 | –15.61 (–35.20 to 3.97)    | 34.13* (9.30 to 58.97)    |
| Children with noncomplex or complex chronic condition | 79.37                              | 103.72 | 26.56* (12.21 to 40.91)    | 89.18             | 105.76 | 14.23* (2.20 to 26.26)     | 12.33 (–2.02 to 26.68)    |
| Children without chronic condition                    | 65.72                              | 98.66  | 20.35* (9.94 to 30.77)     | 68.55             | 88.64  | 7.45 (–0.98 to 15.89)      | 12.90* (1.39 to 24.41)    |
| <b>Preventive medicine visits</b>                     |                                    |        |                            |                   |        |                            |                           |
| Children aged 0–5                                     | 137.49                             | 61.92  | –60.33* (–72.3 to –48.36)  | 138.78            | 60.21  | –66.95* (–75.34 to –58.56) | 6.62 (–5.86 to 19.10)     |
| Children aged 6–11                                    | 43.77                              | 43.48  | –0.66 (–6.45 to 5.12)      | 43.70             | 40.80  | –3.81* (–7.57 to –0.06)    | 3.15 (–2.58 to 8.88)      |
| Children aged 12–17                                   | 37.36                              | 35.17  | –0.01 (–6.75 to 6.72)      | 41.06             | 35.81  | –5.67* (–10.54 to –0.80)   | 5.66 (–1.60 to 12.91)     |
| Children with noncomplex or complex chronic condition | 83.45                              | 53.12  | –24.21* (–33.47 to –14.95) | 78.39             | 49.08  | –26.42* (–32.66 to –20.18) | 2.21 (–8.83 to 13.25)     |
| Children without chronic condition                    | 76.86                              | 47.26  | –29.02* (–36.38 to –21.67) | 78.63             | 46.97  | –32.41* (–37.10 to –27.71) | 3.38 (–4.63 to 11.40)     |
| <b>Hospitalizations</b>                               |                                    |        |                            |                   |        |                            |                           |
| Children aged 0–5                                     | 20.21                              | 3.90   | –10.82* (–15.17 to –6.47)  | 16.02             | 2.19   | –11.70* (–14.36 to –9.04)  | 0.88 (–4.09 to 5.84)      |
| Children aged 6–11                                    | 3.39                               | 2.22   | 0.31 (–3.07 to 3.68)       | 2.75              | 3.97   | 3.01 (–0.23 to 6.26)       | –2.71 (–6.10 to 0.68)     |
| Children aged 12–17                                   | 6.34                               | 10.57  | –0.61 (–6.44 to 5.21)      | 10.44             | 15.88  | 3.63 (–8.33 to 15.59)      | –4.24 (–19.13 to 10.64)   |
| Children with noncomplex or complex chronic condition | 19.73                              | 8.52   | –10.56* (–16.55 to –4.57)  | 16.19             | 12.77  | –2.21 (–11.47 to 7.05)     | –8.35 (–19.05 to 2.36)    |
| Children without chronic condition                    | 5.25                               | 2.80   | –1.25 (–3.07 to 0.56)      | 6.37              | 2.80   | –3.46* (–5.10 to –1.82)    | 2.21 (–0.28 to 4.70)      |
| <b>Emergency department visits</b>                    |                                    |        |                            |                   |        |                            |                           |
| Children aged 0–5                                     | 113.64                             | 69.44  | –33.25* (–46.95 to –19.54) | 112.71            | 75.31  | –20.08* (–29.77 to –10.39) | –13.16* (–26.23 to –0.10) |
| Children aged 6–11                                    | 59.14                              | 51.32  | –6.18 (–16.64 to 4.29)     | 63.04             | 53.73  | –6.27 (–15.52 to 2.97)     | 0.1 (–11.73 to 11.92)     |
| Children aged 12–17                                   | 68.21                              | 95.92  | 16.38 (–3.98 to 36.73)     | 72.14             | 85.87  | 9.16 (–5.66 to 23.98)      | 7.22 (–13.66 to 28.10)    |
| Children with noncomplex or complex chronic condition | 106.24                             | 83.74  | –27.06* (–43.26 to –10.86) | 110.59            | 93.69  | –13.22* (–25.19 to –1.25)  | –13.84 (–29.55 to 1.88)   |
| Children without chronic condition                    | 68.67                              | 61.81  | –4.15 (–13.82 to 5.52)     | 70.44             | 58.94  | –5.39 (–12.41 to 1.64)     | 1.24 (–9.13 to 11.61)     |

95% confidence intervals. Medical complexity determined using the Pediatric Medical Complexity Algorithm, which is based on Center of Excellence on Quality of Care Measures for Children with Complex Needs consensus definitions.

\*  $P < .05$ , \*\*  $P < .01$ , \*\*\*  $P < .001$ .
